# Supplementary material for: Loss of AA13 LPMOs impairs degradation of resistant starch and reduces the growth of Aspergillus nidulans
Source: PubMed Central journal article supplement (PMC7405360; doi:10.1186/s13068-020-01775-z), 2020-08-05
Supplement: 13068_2020_1775_MOESM1_ESM.pdf [file 13068_2020_1775_MOESM1_ESM.pdf]

## Additional File 1

### Loss of AA13 LPMOs impairs degradation of resistant starch and reduces the growth of *Aspergillus nidulans*

Majid Haddad Momeni, Maria Louise Leth, Claus Sternberg, Erwin Schoof, Maike Wennekers Nielsen, Jesper Holck, Christopher T. Workman, Jakob Blæsbjerg Hoof, Maher Abou Hachem\*

Department of Biotechnology and Biomedicine, Technical University of Denmark, Søtofts Plads, 2800 Kgs. Lyngby, Denmark

\*Correspondence: maha@bio.dtu.dk

Content:

**Table S1.** List of strains used in the study

**Table S2.** Primers for generation and validation of the *A. nidulans* mutant strains

**Fig. S1.** Gene targeting and mutant-strain validation

**Fig. S2.** Growth of reference and AA13 gene deletion strains on glucose

**Fig. S3.** Growth of reference and AA13 gene deletion strains on soluble potato starch

**Fig. S4.** Growth of reference and AA13 gene deletion strains on resistant potato starch

**Fig. S5.** Biomass analysis of reference and AA13 gene deletion strains on resistant potato starch at day 5.

**Fig. S6.** Principal component analysis of the proteomic data sets during growth on resistant starch

**Fig. S7.** Venn diagram of the significantly upregulated proteins during growth on resistant potato starch

**Table S1. List of strains used in the study**

| Strain ID | Genotype <sup>a</sup>                                   | Tool <sup>b</sup> | Growth <sup>c</sup> | Strain purpose                 |
|-----------|---------------------------------------------------------|-------------------|---------------------|--------------------------------|
| NID1      | <i>argB2, pyrG89, veA1, nkuAΔ</i>                       | -                 | arg, ura, uri       | Host strain for gene targeting |
| NID731    | <i>veA1, nkuAΔ</i>                                      | -                 | none                | Reference strain for analysis  |
| NID2018   | <i>argB2, pyrG89, veA1, nkuAΔ, aasBΔ, aasAΔ::AfpYrG</i> | GT                | arg                 | Double AA13-gene deletion      |
| NID2114   | <i>argB2, pyrG89, veA1, nkuAΔ, aasAΔ::AfpYrG</i>        | GT                | arg                 | Single AA13-gene deletion      |
| NID2115   | <i>argB2, pyrG89, veA1, nkuAΔ, aasBΔ::AfpYrG</i>        | GT                | arg                 | Single AA13-gene deletion      |
| NID2428   | <i>pyrG89, veA1, nkuAΔ, aasAΔ::AfpYrG</i>               | CC                | none                | Based on NID2114               |
| NID2429   | <i>pyrG89, veA1, nkuAΔ, aasBΔ, aasAΔ::AfpYrG</i>        | CC                | none                | Based on NID2018               |
| NID2438   | <i>pyrG89, veA1, nkuAΔ, aasBΔ::AfpYrG</i>               | CC                | none                | Based on NID2115               |

<sup>a</sup>*aasA* = AN5463, *aasB* = AN6103

<sup>b</sup>Engineering tool applied to construct strain in this study; GT is gene targeting and CC is CRISPR/Cas9-mediated gene editing

<sup>c</sup>Growth requirements may be arginine, uracil and uridine. Final strains for analysis have no growth requirements

**Table S2. Primers for generation and validation of the *A. nidulans* mutant strains**

| Code                                                | Usage                    | Locus <sup>a</sup> | Sequence                                                                                                       |
|-----------------------------------------------------|--------------------------|--------------------|----------------------------------------------------------------------------------------------------------------|
| <u>For gene-targeting substrate construction</u>    |                          |                    |                                                                                                                |
| A1-F                                                | <i>aasA</i> -Up fragment | <i>aasA</i>        | GGGTTTAAUGTCGAAGGAGCAAAGATCGGTG                                                                                |
| A2-R                                                | <i>aasA</i> -Up fragment | <i>aasA</i>        | GGACTTAAUGGTGAGCTGTTTTTCAGATTGAAGCG                                                                            |
| A3-F                                                | <i>aasA</i> -Dw fragment | <i>aasA</i>        | GGCATTAAUGTGGATGAAGATCTGGAGAG                                                                                  |
| A4-R                                                | <i>aasA</i> -Dw fragment | <i>aasA</i>        | GGTCTTAAUGGAGACTCTGAGAGGGTGATG                                                                                 |
| B1-F                                                | <i>aasB</i> -Up fragment | <i>aasB</i>        | GGGTTTAAUGAGAAGCGCGAGGAAGGG                                                                                    |
| B2-R                                                | <i>aasB</i> -Up fragment | <i>aasB</i>        | GGACTTAAUGATGAGTTGCTGTGCTGCTTG                                                                                 |
| B3-F                                                | <i>aasB</i> -Dw fragment | <i>aasB</i>        | GGCATTAAUCGGTGGAGTGTGCAGAAAG                                                                                   |
| B4-R                                                | <i>aasB</i> -Dw fragment | <i>aasB</i>        | GGTCTTAAUGTGGGGAGTGAGTCAAGGG                                                                                   |
| <u>Gene-deletion analysis (see Figure S1)</u>       |                          |                    |                                                                                                                |
| D1-F                                                | Reaction type I          | <i>aasA</i>        | CCTCACCTTATCGTCACGTTCC                                                                                         |
| D2-F                                                | Reaction type I          | <i>aasB</i>        | CCCACGAGCCCTAAATTCAAC                                                                                          |
| D3-R                                                | Reaction type I          | <i>AfpyrG</i>      | GGAAGAGAGGTTACACC                                                                                              |
| D4-F                                                | Reaction type II         | <i>aasA</i>        | CATCCCCAATGCTCAAGACCC                                                                                          |
| D5-R                                                | Reaction type II         | <i>aasA</i>        | CTTGGCTCAGAGCAAGCGC                                                                                            |
| D6-F                                                | Reaction type II         | <i>aasB</i>        | GAGATACTCGGAGAGAGAGCG                                                                                          |
| D7-R                                                | Reaction type II         | <i>aasB</i>        | GCGTACATGTGACATGGGAATG                                                                                         |
| <u>Gene-editing oligo for restoring <i>argB</i></u> |                          |                    |                                                                                                                |
| GE-9 <sup>b</sup>                                   | Repair substrate         | <i>argB2</i>       | TCCTTGGGAAAACGTGGCCATGATCTTCAGCAAAC<br>GAAGCACGAGGACAAGGGTATCTACAGAAGGGGCC<br>GTTGTGCAGATGGGAGGTC <sup>A</sup> |

<sup>a</sup> IDs for targeted loci are *aasA*=AN5463 and *aasB*=AN6103

<sup>b</sup> GE-Oligo9 to be used in transformation with CRISPR vector pFC907, both from Nødvig CS, Hoof JB, Kogle ME, Jarczynska ZD, Lehmebeck J, Klitgaard DK, Mortensen UH: **Efficient oligo nucleotide mediated CRISPR-Cas9 gene editing in *Aspergilli***. *Fungal Genet Biol* 2018, **115**:78-89.

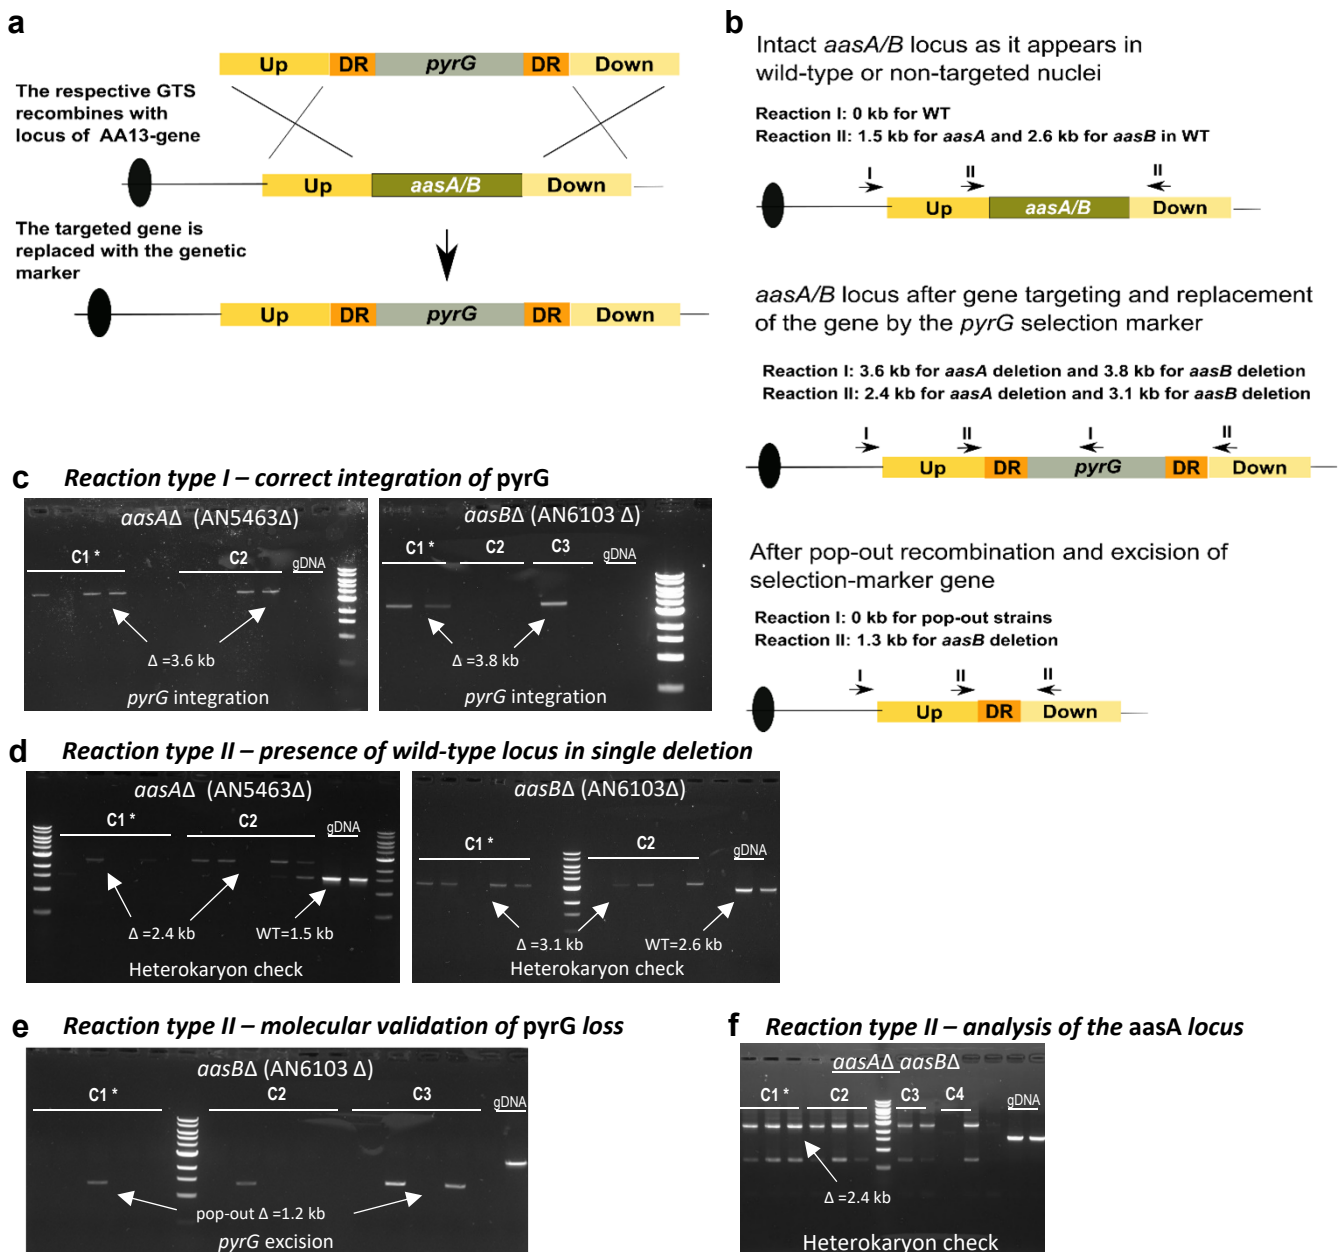

**Fig. S1.** Gene targeting and mutant-strain validation. **a** Target-gene replacement with a selection marker by homologous recombination. **b** Mutant-strain evaluation by diagnostic PCR. Top illustrates the *aasA/aasB* loci, middle shows the replacement of *aasA* or *aasB* by the heterologous *pyrG* (*AfpyrG*). After pop-out recombination of the *pyrG* marker, the remaining sequence patch from one of the direct repeats is depicted in the bottom. Primers for reaction type I anneal outside the targeted region and inside the selection marker, thus a correct-sized band amplified by PCR, indicates successful gene targeting; Primers for reaction type II evaluates presence of remaining nuclei in the colonies of the intact versions of the targeted gene. For diagnostic tissue-PCRs, 2-5 reactions including the same strains are typically analyzed depending on the efficiency. Figure is not to scale. See Table S2 for the primers used in the tissue-PCR analysis. **c** Diagnostic tissue-PCR for verifying single deletions of *aasA* (left) and *aasB* (right) using reaction type I. These analyses showed that two independent restreaked transformants (colony 1 (C1) and colony 2 (C2)) had *pyrG* inserted in the targeted loci with respective bands of 3.6 and 3.8 kb. The colony with a star was used for further work and analysis. The control reactions in the reference strain using genomic DNA gave no corresponding band due to the absence of the heterologous *pyrG*. **d** The check for heterokaryotic (untargeted) single-deletion strains is carried out with PCR-reaction type 2. The single deletions were analyzed, *aasA* (left) and *aasB* (right). All reactions showed a clear distinction between mutant and wild-type loci, and the expected sizes for the specific loci for both scenarios are indicated. Only in one case, for C2 in the left panel we observed a heterokaryon. **e** The *aasB* single deletion was cultivated on 5-FOA containing growth medium, and resulting colonies were restreaked and analyzed using reaction type II. **f** The double-deletion strain was constructed in the *aasB*Δ background, by targeting *aasA*, and transformants were analyzed and verified in reaction type II as in **d** (left).

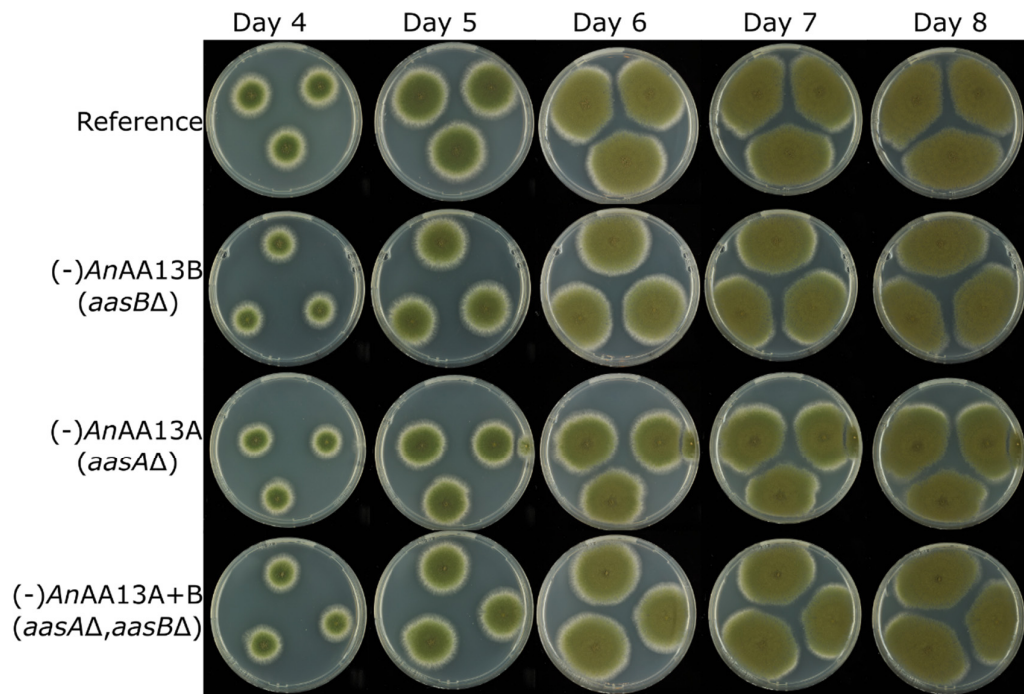

**Fig. S2.** Growth of reference and AA13 gene deletion strains on glucose. The minimal media plates are supplemented with 1% (w/v) carbohydrate substrates.

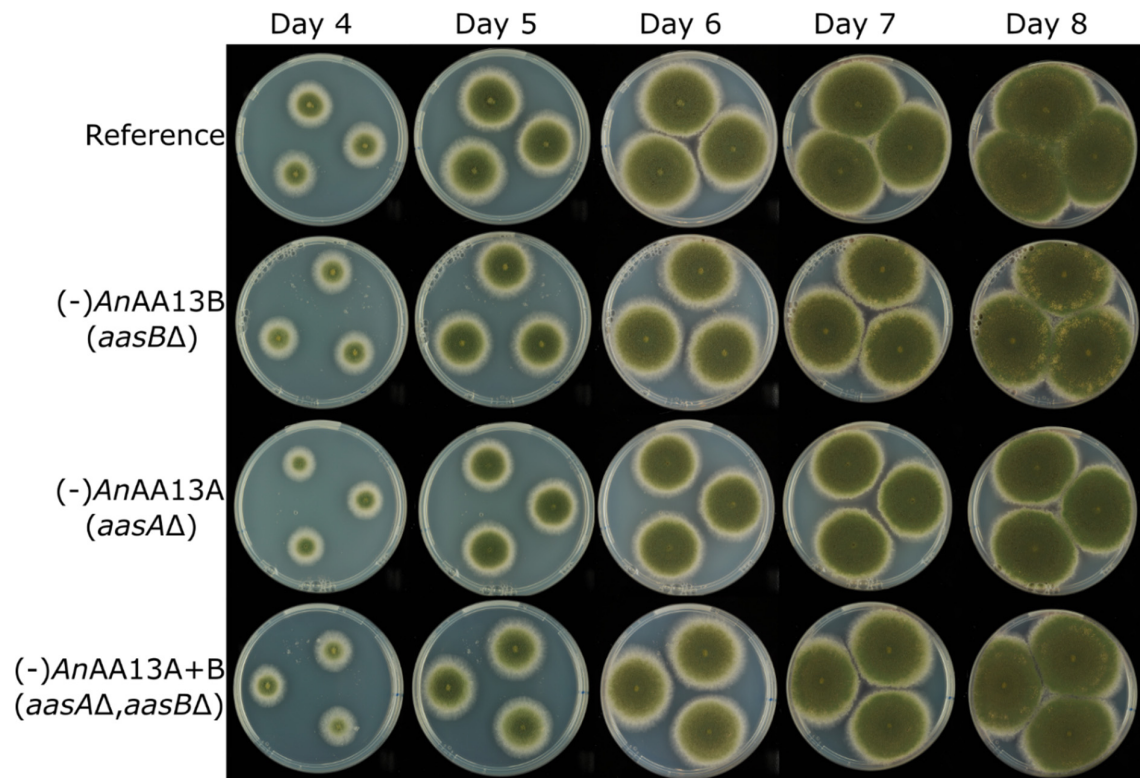

**Fig. S3.** Growth of reference and AA13-gene deletion strains on soluble potato starch. The minimal media plates are supplemented with 1% (w/v) carbohydrate substrates.

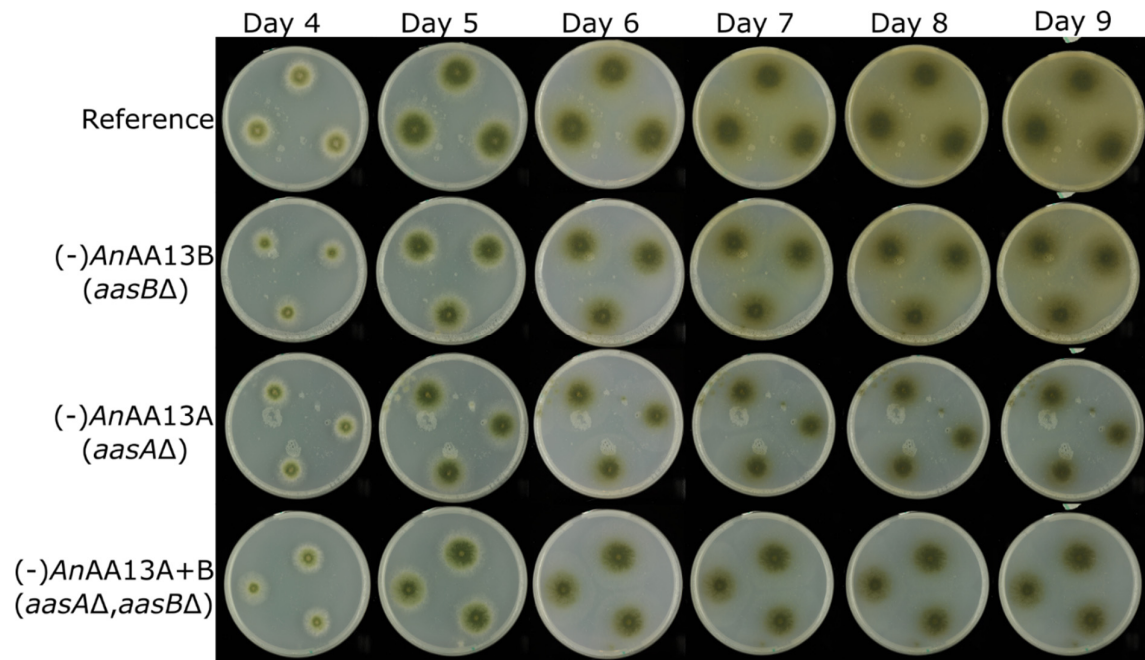

**Fig. S4.** Growth of reference and AA13 gene deletion strains on resistant potato starch. The minimal media plates are supplemented with 1% (w/v) carbohydrate substrates.

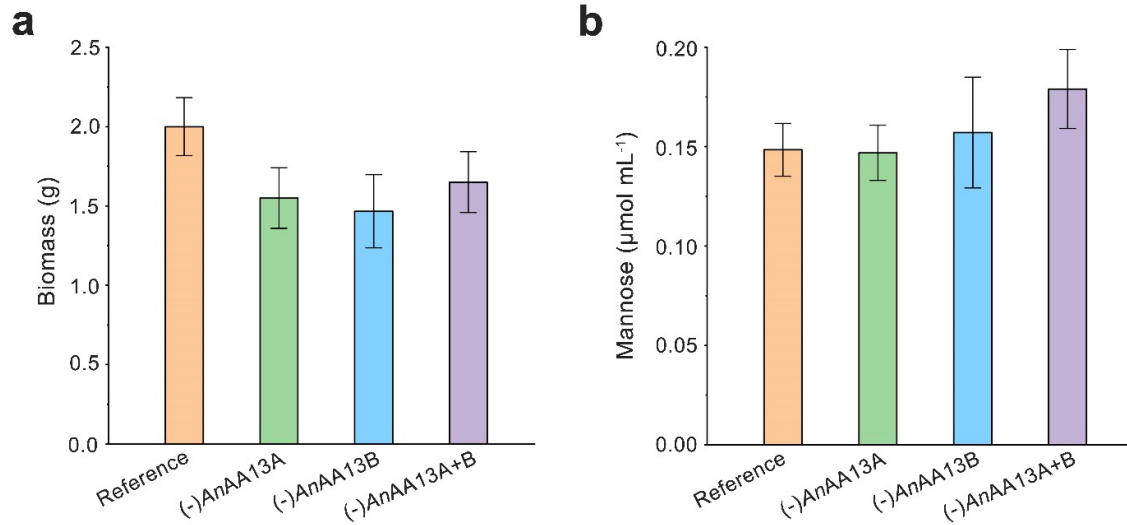

**Fig. S5.** Biomass analysis of the reference and KO *A. nidulans* strains at day 5. **a** Weight of wet biomass scraped from a cloth filter at the harvest of the liquid culture supplemented with 1% (w/v) resistant potato starch. **b** Mannose content analysed after overnight acid hydrolysis and analysis by HPAEC-PAD of the samples in (a). The mannose content is measured as a proxy of biomass, as mannan is structural component of the fungal cell wall. Both measurements are performed in four biological replicates.



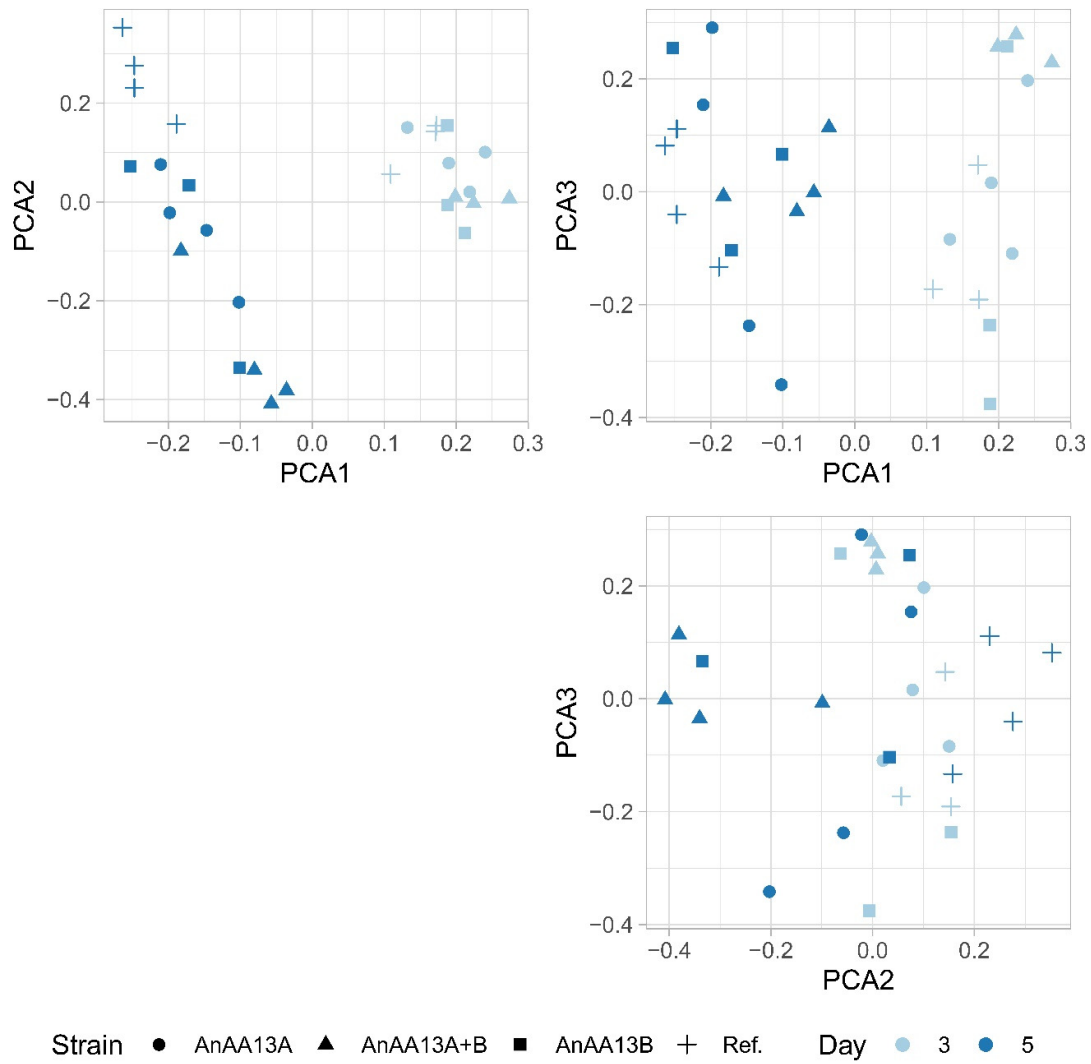

**Fig. S6.** Principal component analyses of the proteomic data sets from biological replicates of the reference and the AA13 gene deletion strains. The plot were generated in R statistical computing software.

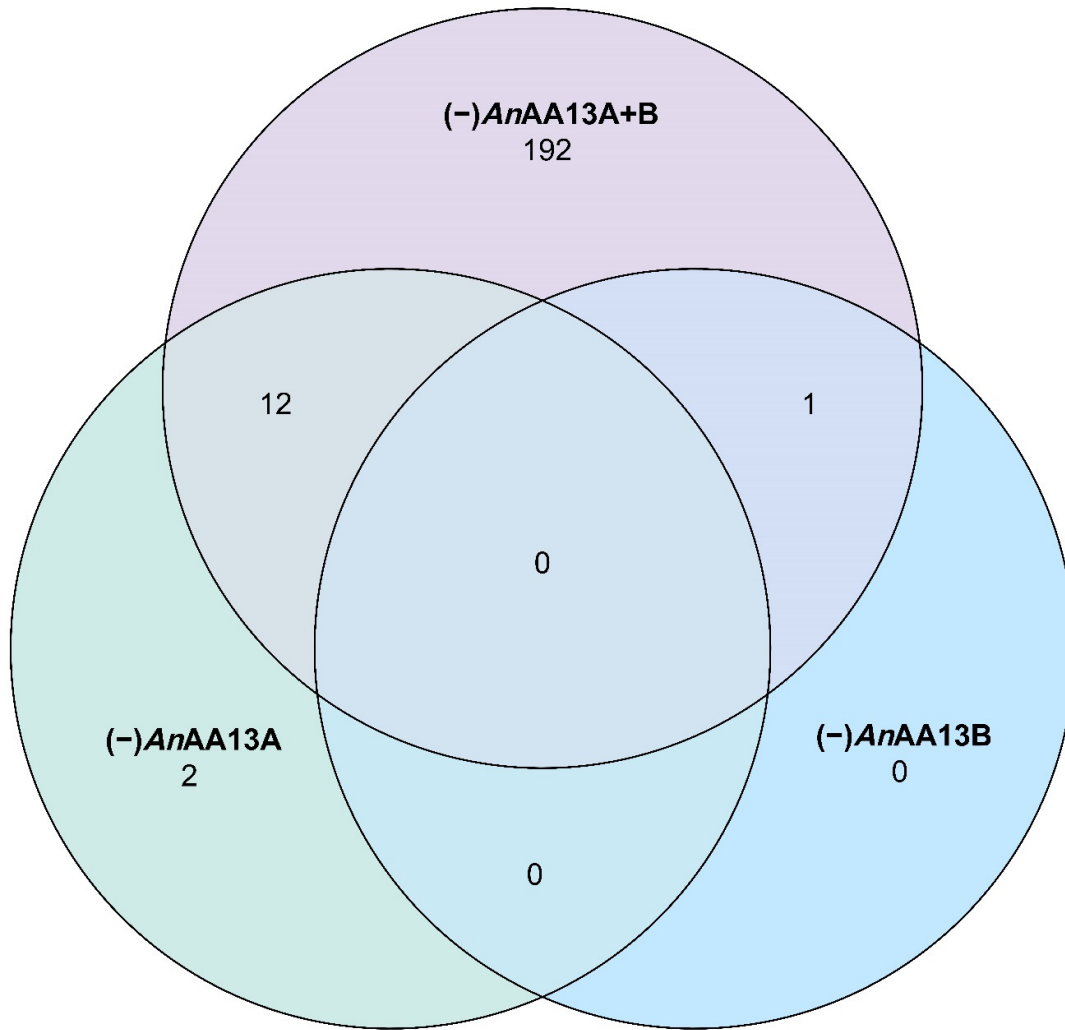

**Fig. S7.** Venn diagram of the significantly regulated proteins for AA13 gene deletion strains ( $\text{Log}_2$  fold change  $>2$ ,  $P \leq 0.05$ ).
